# Supplementary material for: Stress related disorders and risk of cardiovascular disease: population based, sibling controlled cohort study
Source: PubMed Central journal article supplement — BMJ. 2019 Apr 10;365:l1255. doi: 10.1136/bmj.l1255 (PMC6457109; doi:10.1136/bmj.l1255), 2019-04-10
Supplement: sonh047517.ww1.pdf [file sonh047517.ww1.pdf]

Supplementary Table A Summary of prospective cohort studies addressing the association between stress-related disorders and cardiovascular outcomes

| Paper                          | Study design and database                                                                | Exposure                          | Outcomes                                                                                                                  | Sample size and follow-up                                                                     | Main findings                                                                                                                                                                                               | Control for       |                                                                                      |
|--------------------------------|------------------------------------------------------------------------------------------|-----------------------------------|---------------------------------------------------------------------------------------------------------------------------|-----------------------------------------------------------------------------------------------|-------------------------------------------------------------------------------------------------------------------------------------------------------------------------------------------------------------|-------------------|--------------------------------------------------------------------------------------|
|                                |                                                                                          |                                   |                                                                                                                           |                                                                                               |                                                                                                                                                                                                             | Familial factor?  | Other psychiatric comorbidities?                                                     |
| Kubzansky LD 2007 <sup>1</sup> | Prospective cohort, community-dwelling men who served in the military                    | PTSD symptoms                     | CHD (angina pectoris, MI, and fatal CHD), self-reported with medical record checking                                      | 1996 men<br>mean age 60 years;<br>mean follow-up of 13.2 or 9.8 years                         | Top 10 percentile in combat-related PTSD score vs others: OR 1.12 (0.92 to 1.36) for all CHD                                                                                                                | No                | Controlled for self-reported depressive symptoms prevalent to PTSD                   |
| Kubzansky LD 2009 <sup>2</sup> | Prospective cohort, civilian community-dwelling women                                    | PTSD symptoms                     | CHD (angina pectoris, nonfatal MI, fatal MI, and other cardiac death), self-reported or tracked from National Death Index | 1059 women<br>mean age 44.4 years;<br>up to 14-year follow-up                                 | Top 4 percentile (five or more symptom) vs 89.1% of the sample reporting 0 symptoms: OR 3.46 (95% CI 1.35 to 8.90)                                                                                          | No                | No                                                                                   |
| Jordan HT 2011 <sup>3</sup>    | Prospective cohort, adults exposed to the September 11, 2001 World Trade Center disaster | PTSD Checklist score $\geq 44$    | Self-reported physician-diagnosed angina, heart attack, and/or other heart diseases                                       | 39,324 participants (men 24222, women 15102; >18 years at exposure), 2.9 years follow-up      | Participants with PTSD vs without PTSD at baseline: HR 1.68, 95% CI 1.33 to 2.12 in women, HR 1.62, 95% CI 1.34 to 1.96 in men                                                                              | No                | No                                                                                   |
| Jordan HT 2013 <sup>4</sup>    | Prospective cohort, adults exposed to the September 11, 2001 World Trade Center disaster | PTSD Checklist score $\geq 44$    | Cerebrovascular or heart disease hospitalization                                                                          | 46 346 participants (men 27667, women 18679; >18 years at exposure), mean follow-up 6.5 years | Participants with PTSD vs without PTSD at baseline: HR 1.32, 95% CI 1.01 to 1.71 in women but HR 1.16, 95% CI 0.97 to 1.40 in men                                                                           | No                | No                                                                                   |
| Vaccarino V 2013 <sup>5</sup>  | Prospective cohort, twins from the Vietnam Era Twin Registry (veteran sample)            | PTSD diagnosis                    | CHD diagnosed during clinical visit, identified through clinical events or quantitative measures of myocardial perfusion  | 562 twins (281 pairs)<br>mean age 42.6 years;<br>median follow-up 13 years                    | Twins with PTSD vs Twins without: OR 2.1 (95% CI 1.1 to 3.9)                                                                                                                                                | Yes, a twin study | Controlled for major depression, alcohol or drug abuse/dependence at baseline        |
| Sumner JA 2015 <sup>6</sup>    | Prospective cohort, women in the Nurses' Health Study II                                 | Trauma exposure and PTSD symptoms | CVD events (MI and stroke) confirmed by additional information or medical record review                                   | 49978 women<br>mean age 35 at entry<br>follow-up up to 20 years                               | Compared to individuals with no trauma exposure, $\geq 4$ PTSD symptoms: HR, 1.60 95% CI 1.20 to 2.13; 1 to 3 PTSD symptoms: 0.99 (0.71 to 1.38) ; trauma-exposed and no PTSD symptoms: 1.45 (1.15 to 1.83) | No                | No                                                                                   |
| Roy SS 2015 <sup>7</sup>       | Prospective cohort, community-based sample of veterans                                   | PTSD diagnosis                    | Incident heart failure                                                                                                    | 8242 veterans , mean age 63 years at entry,                                                   | Veterans with PTSD vs without PTSD: HR 1.47 (95% CI 1.13 to 1.92)                                                                                                                                           | No                | A sensitivity analysis was performed where comorbid illnesses (including depression, |

<sup>1</sup> Kubzansky, L. D., et al. (2007). "Prospective study of posttraumatic stress disorder symptoms and coronary heart disease in the normative aging study." Archives of General Psychiatry 64(1): 109-116.<sup>2</sup> Kubzansky, L. D., et al. (2009). "A prospective study of posttraumatic stress disorder symptoms and coronary heart disease in women." Health Psychol 28(1): 125-130.<sup>3</sup> Jordan, H. T., et al. (2011). "Heart disease among adults exposed to the September 11, 2001 World Trade Center disaster: Results from the World Trade Center Health Registry." Preventive Medicine 53(6): 370-376.<sup>4</sup> Jordan, H. T., et al. (2013). "Cardiovascular disease hospitalizations in relation to exposure to the September 11, 2001 World Trade Center Disaster and posttraumatic stress disorder." Journal of the American Heart Association 2(5).<sup>5</sup> Vaccarino, V., et al. (2013). "Post-traumatic stress disorder and incidence of coronary heart disease: a twin study." Journal of the American College of Cardiology 62(11): 970-978.<sup>6</sup> Sumner, J. A., et al. (2015). "Trauma exposure and posttraumatic stress disorder symptoms predict onset of cardiovascular events in women." Circulation 132(4): 251-259.<sup>7</sup> Roy, S. S., et al. (2015). "Posttraumatic stress disorder and incident heart failure among a community-based sample of US veterans." American Journal of Public Health 105(4): 757-763.

|                              |                                                          |                                        |                                                                                                                                                                                                                  | mean follow-up of 7.2 years                                                      |                                                                                                                                                                                                                                                                                                                                                                                |    | anxiety disorder, and adjustment disorder) , were added to the model (data not shown)                                                    |
|------------------------------|----------------------------------------------------------|----------------------------------------|------------------------------------------------------------------------------------------------------------------------------------------------------------------------------------------------------------------|----------------------------------------------------------------------------------|--------------------------------------------------------------------------------------------------------------------------------------------------------------------------------------------------------------------------------------------------------------------------------------------------------------------------------------------------------------------------------|----|------------------------------------------------------------------------------------------------------------------------------------------|
| Gradus JL 2015 <sup>8</sup>  | Prospective cohort Danish national registry data         | PTSD and adjustment disorder diagnoses | CVD events including MI, stroke, ischemic stroke and VTE                                                                                                                                                         | 4724 PTSD, 64,855 adjustment disorder mean age 19 years mean follow-up 7.9 years | PTSD patients vs general population: No SIR 1.5 (95% CI 1.1 to 1.9) for MI; 1.7(1.4 to 2.1) for stroke; 1.8 (1.4 to 2.4 for ischemic stroke; and 2.1 (95% CI 1.7 to 2.7) for VTE adjustment disorder patients vs general population: SIR 1.5 (95% CI 1.4 to 1.6) for MI; 1.8(1.7 to 1.9) for stroke; 1.7 (1.6 to 1.9) for ischemic stroke; and 1.9 (95% CI 1.8 to 2.0) for VTE | No | Adjusted for depression or alcohol abuse diagnoses at baseline                                                                           |
| Sumner JA 2016 <sup>9</sup>  | Prospective cohort, Women in the Nurses' Health Study II | Trauma exposure and PTSD symptoms      | Incident hypertension (physician-diagnosed), self-reported at baseline, and subsequent biennial questions                                                                                                        | 47 514 women mean age 35 at entry, follow-up up to 22 years                      | Compared to women with no trauma exposure, 6-7 PTSD symptoms: HR 1.20, 95% CI 1.12 to 1.30; 4-5 symptoms: HR 1.17, 95% CI 1.10 to 1.25; 1-3 symptoms: HR 1.12, 95% CI 1.06 to 1.18; no symptom HR 1.04, 95% CI 1.00 to 1.09                                                                                                                                                    | No | Adjusted for self-reported lifetime depression ( $\geq 2$ weeks) in sensitivity analysis---HRs were attenuated to 1.10, 1.11, 1.05, 0.98 |
| Sumner JA 2016 <sup>10</sup> | Prospective cohort, Women in the Nurses' Health Study II | Trauma exposure and PTSD symptoms      | Physician-diagnosed VTE, self-reported at baseline, and subsequent biennial questions                                                                                                                            | 49296 women, mean age 35 at entry, follow-up up to 22 years                      | Compared to women with no trauma exposure, 6-7 PTSD symptoms: HR 2.42, 95% CI 1.83 to 3.20; 4-5 symptoms: HR 2.00, 95% CI 1.55 to 2.59; 1-3 symptoms: HR 1.44, 95% CI 1.12 to 1.84; no symptom HR 1.72, 95% CI 1.43 to 2.08                                                                                                                                                    | No | Adjusted for self-reported lifetime depression ( $\geq 2$ weeks) in sensitivity analysis---HRs were attenuated to 2.06, 1.77, 1.34, 1.68 |
| Burg MM 2017 <sup>11</sup>   | Prospective cohort, representative sample of veterans    | PTSD diagnosis                         | Incident hypertension identified through:(1) a clinical diagnosis of hypertension (2) a prescription for antihypertensive medication (3) a clinic blood pressure test ( $\geq 140/90$ mm Hg, systolic/diastolic) | 194,319 veterans (85% were men), median age 27.9; median follow-up 2.4 years     | Veterans with PTSD vs. without PTSD: HRs ranged from 1.12 (95% CI, 1.08 to 1.17) to 1.30 (95% CI, 1.26 to 1.34), depending on different approaches of hypertension case identification                                                                                                                                                                                         | No | Partly, adjusted for major depression at baseline                                                                                        |

CHD, coronary heart disease; CI, confidence interval; CVD, cardiovascular disease; HR, hazard ratio; MI, myocardial infarction; OR, odds ratio; PTSD, posttraumatic stress disorder; SIR, standardized incidence rate; VTE, venous thromboembolism.

<sup>8</sup> Gradus, J. L., et al. (2015). "Associations between stress disorders and cardiovascular disease events in the Danish population." *Bmj Open* 5(12).

<sup>9</sup> Sumner, J. A., et al. (2016). "Post-traumatic stress disorder symptoms and risk of hypertension over 22 years in a large cohort of younger and middle-aged women." *Psychological Medicine* 46(15): 3105-3116.

<sup>10</sup> Sumner, J. A., et al. (2016). "Associations of trauma exposure and posttraumatic stress symptoms with venous thromboembolism over 22 years in women." *Journal of the American Heart Association* 5(5).

<sup>11</sup> Burg, M. M., et al. (2017). "Risk for incident hypertension associated with posttraumatic stress disorder in military veterans and the effect of posttraumatic stress disorder treatment." *Psychosomatic Medicine* 79(2): 181-188.

Supplementary Table B International Classification of Diseases (ICD) codes for exposure and outcome identifications

|                                                         | <b>ICD-9</b>                                                     | <b>ICD-10</b>                                            |
|---------------------------------------------------------|------------------------------------------------------------------|----------------------------------------------------------|
| <b>All stress-related disorders</b>                     | 309, 308                                                         | F43                                                      |
| Posttraumatic stress disorder                           | 309B                                                             | F43.1                                                    |
| Acute stress reaction                                   | 309A, 308                                                        | F43.0                                                    |
| Adjustment disorder                                     | 309X                                                             | F43.2                                                    |
| Other stress reactions                                  | 309X                                                             | F43.8, F43.9                                             |
| <b>Any psychiatric disorder</b>                         | 290–315                                                          | F**                                                      |
| <b>Any cardiovascular disease</b>                       | 390-438, 440,444,445                                             | I00-I70, I730, I74-I75                                   |
| <i>Major category</i>                                   | <i>Individual diagnosis</i>                                      |                                                          |
| Ischemic heart disease                                  | Acute myocardial infarction                                      | I21, I23, I24                                            |
|                                                         | Other ischemic heart disease (excluding ischemic cardiomyopathy) | I20, I22, I25 (excl. I25.5)                              |
|                                                         | Arachnoidal bleeding                                             | I60                                                      |
| Cerebrovascular disease*                                | Hemorrhagic stroke                                               | I61-I62                                                  |
|                                                         | Ischemic stroke                                                  | I63-I64                                                  |
|                                                         | Other cerebrovascular disease                                    | I65-I69                                                  |
|                                                         | Artery thrombosis/embolus                                        | I74,I75                                                  |
| Emboli and thrombosis                                   | Pulmonary emboli                                                 | I26                                                      |
|                                                         | Essential hypertension                                           | I10                                                      |
| Hypertensive diseases                                   | Other hypertensive disease                                       | I11- I16, I674                                           |
|                                                         | Heart failure                                                    | I50                                                      |
| Heart failure                                           | Ischemic cardiomyopathy                                          | I25.5                                                    |
|                                                         | Takotsubo cardiomyopathy                                         | I42.0, I42.8, I42.9                                      |
|                                                         | Arrhythmia                                                       | I47-I49                                                  |
| Arrhythmia/conduction disorder                          | Conduction disorder                                              | I44-I45                                                  |
|                                                         | Cardiac arrest                                                   | I46                                                      |
| <b>Covariates: history of severe somatic conditions</b> |                                                                  |                                                          |
| Chronic pulmonary disease                               | 490-496                                                          | J40-J47                                                  |
| Connective tissue disease                               | 710A, 710B, 710E, 714A, 714B, 714C, 714W,714X, 725               | M05, M06, M32-M34, M35.1, M35.3                          |
| Diabetes                                                | 250                                                              | E10-E14                                                  |
| Renal diseases                                          | 582,583                                                          | N01, N03, N05.2-N05.7                                    |
| Liver diseases                                          | 571C, 571E,571F, 571G, 572C, 572D, 572E, 572W, 456A, 456B, 456C  | K70.2-K70.4, K71.7, K72.1, K72.9, K73, K74, K76.6, K76.7 |
| Ulcer diseases                                          | 531-534                                                          | K25-K28                                                  |
| HIV infection/AIDS                                      | 042-044                                                          | B20-B24                                                  |

\*We additionally defined acute cerebrovascular disease as a diagnosis of arachnoid bleeding, intracerebral haemorrhage, or cerebral infarction (ICD 9 430,431,434 and ICD 10 I60, I61, I63).

Supplementary Table C Crude incidence rates and hazard ratios with 95% confidence intervals for cardiovascular diseases (CVD) among patients with **posttraumatic stress disorder**, compared to *their full siblings or matched unexposed individuals*, **stratified by time of follow-up** (<1 or ≥1 year)

|                                 |                                                                                       | Analyses of sibling cohort                           |                                         | Analyses of population-matched cohort                             |                                         |
|---------------------------------|---------------------------------------------------------------------------------------|------------------------------------------------------|-----------------------------------------|-------------------------------------------------------------------|-----------------------------------------|
|                                 |                                                                                       | Number of cases (incidence rate*), patients/siblings | Hazard ratio (95% confidence interval)† | Number of cases (incidence rate*), patients/unexposed individuals | Hazard ratio (95% confidence interval)† |
| <b><u>Model information</u></b> |                                                                                       | <b>&lt;1 year of follow-up</b>                       |                                         |                                                                   |                                         |
| <b>Any CVD</b>                  | i. Controlled for sex, birth year, education level, family income, and marital status |                                                      | 1.96 (1.25 to 3.06)                     |                                                                   | 1.94 (1.50 to 2.52)                     |
|                                 | ii. above + history of other psychiatric disorder                                     | 54(6.65)/63(4.73)                                    | 2.05 (1.20 to 3.49)                     | 73(6.98)/354(3.37)                                                | 1.63 (1.22 to 2.17)                     |
|                                 | iii. above + history of severe somatic diseases                                       |                                                      | 2.03 (1.19 to 3.47)                     |                                                                   | 1.55 (1.16 to 2.06)                     |
|                                 | iv. above + family history of CVD                                                     |                                                      | -                                       |                                                                   | 1.53 (1.14 to 2.04)                     |
| <b>Subtypes of CVD‡</b>         |                                                                                       |                                                      |                                         |                                                                   |                                         |
|                                 | Ischemic heart disease                                                                | 6(0.74)/10(0.75)                                     | 2.25 (0.63 to 8.10)                     | 8(0.76)/72(0.69)                                                  | 0.89 (0.40 to 2.00)                     |
|                                 | Cerebrovascular disease                                                               | 8(0.98)/10(0.75)                                     | 3.70 (0.78 to 17.6)                     | 11(1.05)/45(0.43)                                                 | 1.63 (0.71 to 3.72)                     |
|                                 | Emboli and thrombosis                                                                 | 3(0.37)/5(0.37)                                      | 1.11 (0.13 to 9.44)                     | 7(0.67)/20(0.19)                                                  | 3.22 (0.93 to 11.1)                     |
|                                 | Hypertensive disease                                                                  | 14(1.72)/14(1.05)                                    | 2.17 (0.80 to 5.90)                     | 18(1.72)/63(0.60)                                                 | 2.60 (1.39 to 4.86)                     |
|                                 | Heart failure                                                                         | 2(0.25)/0(0)                                         | -                                       | 3(0.29)/15(0.14)                                                  | 1.57 (0.23 to 10.7)                     |
|                                 | Arrhythmia/conduction disorder                                                        | 11(1.35)/18(1.35)                                    | 0.98 (0.32 to 3.00)                     | 15(1.43)/103(0.98)                                                | 0.97 (0.53 to 1.79)                     |
|                                 | Fatal CVD events <sup>€</sup>                                                         | 5(0.61)/2(0.15)                                      | 0.28 (0.01 to 7.88)                     | 5(0.48)/24(0.23)                                                  | 1.24 (0.38 to 4.09)                     |
| <b><u>Model information</u></b> |                                                                                       | <b>≥1 year of follow-up</b>                          |                                         |                                                                   |                                         |
| <b>Any CVD</b>                  | i. Controlled for sex, birth year, education level, family income, and marital status |                                                      | 1.59 (1.38 to 1.83)                     |                                                                   | 1.59 (1.46 to 1.73)                     |
|                                 | ii. above + history of other psychiatric disorder                                     | 507(10.10)/723(7.99)                                 | 1.45 (1.24 to 1.69)                     | 676(10.51)/4575(6.83)                                             | 1.41 (1.29 to 1.54)                     |
|                                 | iii. above + history of severe somatic diseases                                       |                                                      | 1.44 (1.23 to 1.68)                     |                                                                   | 1.38 (1.26 to 1.51)                     |
|                                 | iv. above + family history of CVD                                                     |                                                      | -                                       |                                                                   | 1.37 (1.25 to 1.50)                     |
| <b>Subtypes of CVD‡</b>         |                                                                                       |                                                      |                                         |                                                                   |                                         |
|                                 | Ischemic heart disease                                                                | 144(2.74)/220(2.36)                                  | 1.46 (1.06 to 2.00)                     | 191(2.85)/1264(1.84)                                              | 1.29 (1.09 to 1.53)                     |
|                                 | Cerebrovascular disease                                                               | 126(2.39)/129(1.37)                                  | 2.15 (1.53 to 3.01)                     | 158(2.35)/776(1.12)                                               | 1.91 (1.57 to 2.31)                     |
|                                 | Emboli and thrombosis                                                                 | 45(0.85)/41(0.43)                                    | 2.45 (1.28 to 4.68)                     | 54(0.80)/319(0.46)                                                | 1.57 (1.14 to 2.16)                     |
|                                 | Hypertensive disease                                                                  | 111(2.10)/157(1.67)                                  | 1.58 (1.14 to 2.18)                     | 146(2.17)/1155(1.67)                                              | 1.18 (0.97 to 1.42)                     |
|                                 | Heart failure                                                                         | 45(0.85)/64(0.68)                                    | 1.77 (1.03 to 3.04)                     | 60(0.88)/360(0.52)                                                | 1.29 (0.95 to 1.75)                     |
|                                 | Arrhythmia/conduction disorder                                                        | 128(2.43)/214(2.29)                                  | 1.09 (0.82 to 1.44)                     | 183(2.73)/1398(2.03)                                              | 1.19 (1.00 to 1.41)                     |
|                                 | Fatal CVD events <sup>€</sup>                                                         | 43(0.85)/55(0.61)                                    | 1.84 (0.97 to 3.52)                     | 60(0.94)/344(0.51)                                                | 1.30 (0.95 to 1.79)                     |

CVD, cardiovascular diseases

\* per 1,000 person-years

† Hazard ratios and 95% confidence intervals were derived from Cox models, stratified by family identifier (for sibling-based comparison) or matching identifier (birth year and sex, for population-based comparison), and adjusted for factors listed in model information column. Time since the index date was used as underlying time scale.

‡ The calculation of hazard ratios and 95% confidence intervals for subtypes of CVD was based on fully adjusted COX models (model iii for sibling-based comparison, and model iv for population-based comparison)

€ A fatal CVD was defined as death within 30 days after a major incident CVD event. This group involved fatal CVD cases from all above subtypes.

Supplementary Table D Crude incidence rates and hazard ratios with 95% confidence intervals for cardiovascular diseases (CVD) among patients with **acute stress reaction**, compared to *their full siblings or matched unexposed individuals*, **stratified by time of follow-up** (<1 or ≥1 year)

|                                 |                                                                                       | Analyses of sibling cohort                           |                                         | Analyses of population-matched cohort                             |                                         |
|---------------------------------|---------------------------------------------------------------------------------------|------------------------------------------------------|-----------------------------------------|-------------------------------------------------------------------|-----------------------------------------|
|                                 |                                                                                       | Number of cases (incidence rate*), patients/siblings | Hazard ratio (95% confidence interval)† | Number of cases (incidence rate*), patients/unexposed individuals | Hazard ratio (95% confidence interval)† |
| <b><u>Model information</u></b> |                                                                                       | <b>&lt;1 year of follow-up</b>                       |                                         |                                                                   |                                         |
| <b>Any CVD</b>                  | i. Controlled for sex, birth year, education level, family income, and marital status |                                                      | 1.74 (1.48 to 2.06)                     |                                                                   | 2.00 (1.82 to 2.20)                     |
|                                 | ii. above + history of other psychiatric disorder                                     | 380(8.23)/378(4.99)                                  | 1.63 (1.37 to 1.94)                     | 517(8.67)/2558(4.26)                                              | 1.77 (1.60 to 1.96)                     |
|                                 | iii. above + history of severe somatic diseases                                       |                                                      | 1.62 (1.36 to 1.93)                     |                                                                   | 1.75 (1.59 to 1.94)                     |
|                                 | iv. above + family history of CVD                                                     |                                                      | -                                       |                                                                   | 1.75 (1.58 to 1.93)                     |
| <b>Subtypes of CVD‡</b>         |                                                                                       |                                                      |                                         |                                                                   |                                         |
|                                 | Ischemic heart disease                                                                | 95(2.05)/97(1.28)                                    | 1.69 (1.17 to 2.45)                     | 517(8.67)/2558(4.26)                                              | 1.81 (1.48 to 2.23)                     |
|                                 | Cerebrovascular disease                                                               | 55(1.19)/52(0.68)                                    | 1.81 (1.11 to 2.96)                     | 131(2.19)/573(0.95)                                               | 2.08 (1.62 to 2.68)                     |
|                                 | Emboli and thrombosis                                                                 | 31(0.67)/26(0.34)                                    | 2.03 (1.00 to 4.10)                     | 86(1.44)/353(0.59)                                                | 1.89 (1.28 to 2.81)                     |
|                                 | Hypertensive disease                                                                  | 71(1.53)/59(0.78)                                    | 2.28 (1.47 to 3.53)                     | 38(0.63)/146(0.24)                                                | 1.89 (1.49 to 2.41)                     |
|                                 | Heart failure                                                                         | 19(0.41)/15(0.20)                                    | 4.37 (1.04 to 18.42)                    | 92(1.54)/472(0.78)                                                | 2.02 (1.27 to 3.21)                     |
|                                 | Arrhythmia/conduction disorder                                                        | 85(1.84)/105(1.38)                                   | 1.28 (0.89 to 1.83)                     | 26(0.43)/106(0.18)                                                | 1.48 (1.20 to 1.82)                     |
|                                 | Fatal CVD events <sup>€</sup>                                                         | 48(1.04)/31(0.41)                                    | 3.65 (1.55 to 8.59)                     | 116(1.94)/730(1.21)                                               | 2.24 (1.64 to 3.05)                     |
| <b><u>Model information</u></b> |                                                                                       | <b>≥1 year of follow-up</b>                          |                                         |                                                                   |                                         |
| <b>Any CVD</b>                  | i. Controlled for sex, birth year, education level, family income, and marital status |                                                      | 1.40 (1.33 to 1.48)                     |                                                                   | 1.54 (1.49 to 1.59)                     |
|                                 | ii. above + history of other psychiatric disorder                                     | 3461(10.34)/5439(8.87)                               | 1.32 (1.25 to 1.39)                     | 4713(10.82)/33227(7.27)                                           | 1.41 (1.36 to 1.46)                     |
|                                 | iii. above + history of severe somatic diseases                                       |                                                      | 1.31 (1.24 to 1.38)                     |                                                                   | 1.39 (1.34 to 1.43)                     |
|                                 | iv. above + family history of CVD                                                     |                                                      | -                                       |                                                                   | 1.38 (1.34 to 1.43)                     |
| <b>Subtypes of CVD‡</b>         |                                                                                       |                                                      |                                         |                                                                   |                                         |
|                                 | Ischemic heart disease                                                                | 1043(3.00)/1761(2.78)                                | 1.39 (1.26 to 1.54)                     | 1425(3.15)/9080(1.93)                                             | 1.44 (1.36 to 1.53)                     |
|                                 | Cerebrovascular disease                                                               | 688(1.96)/984(1.54)                                  | 1.44 (1.27 to 1.62)                     | 956(2.10)/5630(1.19)                                              | 1.55 (1.44 to 1.67)                     |
|                                 | Emboli and thrombosis                                                                 | 286(0.81)/356(0.56)                                  | 1.46 (1.20 to 1.78)                     | 382(0.83)/2273(0.48)                                              | 1.49 (1.32 to 1.67)                     |
|                                 | Hypertensive disease                                                                  | 713(2.04)/1225(1.92)                                 | 1.15 (1.03 to 1.29)                     | 975(2.14)/8170(1.74)                                              | 1.24 (1.15 to 1.33)                     |
|                                 | Heart failure                                                                         | 286(0.81)/455(0.71)                                  | 1.40 (1.14 to 1.71)                     | 412(0.90)/2563(0.54)                                              | 1.31 (1.17 to 1.47)                     |
|                                 | Arrhythmia/conduction disorder                                                        | 944(2.70)/1488(2.34)                                 | 1.21 (1.09 to 1.33)                     | 1260(2.77)/10185(2.17)                                            | 1.24 (1.16 to 1.32)                     |
|                                 | Fatal CVD events <sup>€</sup>                                                         | 393(1.17)/528(0.86)                                  | 1.43 (1.19 to 1.72)                     | 581(1.34)/2640(0.58)                                              | 1.79 (1.61 to 1.98)                     |

CVD, cardiovascular diseases

† Hazard ratios and 95% confidence intervals were derived from Cox models, stratified by family identifier (for sibling-based comparison) or matching identifier (birth year and sex, for population-based comparison), and adjusted for factors listed in model information column. Time since the index date was used as underlying time scale.

‡ The calculation of hazard ratios and 95% confidence intervals for subtypes of CVD was based on fully adjusted COX models (model iii for sibling-based comparison, and model iv for population-based comparison)

€ A fatal CVD was defined as death within 30 days after a major incident CVD event. This group involved fatal CVD cases from all above subtypes.

Supplementary Table E Crude incidence rates and hazard ratios with 95% confidence intervals for cardiovascular diseases (CVD) among patients with **adjustment disorder and other stress reactions**, compared to *their full siblings or matched unexposed individuals*, **stratified by time of follow-up** (<1 or ≥1 year)

|                                 |                                                                                       | Analyses of sibling cohort                           |                                         | Analyses of population-matched cohort                             |                                         |
|---------------------------------|---------------------------------------------------------------------------------------|------------------------------------------------------|-----------------------------------------|-------------------------------------------------------------------|-----------------------------------------|
|                                 |                                                                                       | Number of cases (incidence rate*), patients/siblings | Hazard ratio (95% confidence interval)† | Number of cases (incidence rate*), patients/unexposed individuals | Hazard ratio (95% confidence interval)† |
| <b><u>Model information</u></b> |                                                                                       | <b>&lt;1 year of follow-up</b>                       |                                         |                                                                   |                                         |
| <b>Any CVD</b>                  | i. Controlled for sex, birth year, education level, family income, and marital status |                                                      | 1.77 (1.49 to 2.10)                     |                                                                   | 1.84 (1.68 to 2.03)                     |
|                                 | ii. above + history of other psychiatric disorder                                     | 377(8.13)/365(4.90)                                  | 1.65 (1.39 to 1.98)                     | 504(8.48)/2712(4.54)                                              | 1.72 (1.56 to 1.91)                     |
|                                 | iii. above + history of severe somatic diseases                                       |                                                      | 1.64 (1.37 to 1.96)                     |                                                                   | 1.70 (1.54 to 1.88)                     |
|                                 | iv. above + family history of CVD                                                     |                                                      | -                                       |                                                                   | 1.69 (1.53 to 1.88)                     |
| <b>Subtypes of CVD‡</b>         |                                                                                       |                                                      |                                         |                                                                   |                                         |
|                                 | Ischemic heart disease                                                                | 60(1.29)/86(1.15)                                    | 1.33 (0.88 to 2.01)                     | 87(1.46)/582(0.97)                                                | 1.40 (1.10 to 1.79)                     |
|                                 | Cerebrovascular disease                                                               | 57(1.23)/57(0.76)                                    | 1.77 (1.08 to 2.89)                     | 79(1.33)/331(0.55)                                                | 1.93 (1.48 to 2.52)                     |
|                                 | Emboli and thrombosis                                                                 | 27(0.58)/25(0.33)                                    | 2.29 (0.91 to 5.74)                     | 39(0.65)/175(0.29)                                                | 1.94 (1.34 to 2.81)                     |
|                                 | Hypertensive disease                                                                  | 83(1.78)/70(0.94)                                    | 2.40 (1.52 to 3.78)                     | 109(1.83)/537(0.90)                                               | 2.02 (1.62 to 2.51)                     |
|                                 | Heart failure                                                                         | 20(0.43)/14(0.19)                                    | 5.73 (1.07 to 30.6)                     | 23(0.39)/96(0.16)                                                 | 1.77 (1.08 to 2.93)                     |
|                                 | Arrhythmia/conduction disorder                                                        | 100(2.15)/92(1.23)                                   | 1.52 (1.08 to 2.15)                     | 132(2.22)/804(1.34)                                               | 1.54 (1.27 to 1.87)                     |
|                                 | Fatal CVD events <sup>€</sup>                                                         | 43(0.92)/33(0.44)                                    | 1.36 (0.71 to 2.61)                     | 59(0.99)/203(0.34)                                                | 2.04 (1.46 to 2.85)                     |
| <b><u>Model information</u></b> |                                                                                       | <b>≥1 year of follow-up</b>                          |                                         |                                                                   |                                         |
| <b>Any CVD</b>                  | i. Controlled for sex, birth year, education level, family income, and marital status |                                                      | 1.34 (1.27 to 1.41)                     |                                                                   | 1.50 (1.46 to 1.55)                     |
|                                 | ii. above + history of other psychiatric disorder                                     | 3278(10.21)/5116(9.01)                               | 1.25 (1.18 to 1.32)                     | 4438(10.72)/31681(7.33)                                           | 1.36 (1.31 to 1.41)                     |
|                                 | iii. above + history of severe somatic diseases                                       |                                                      | 1.23 (1.17 to 1.31)                     |                                                                   | 1.34 (1.30 to 1.39)                     |
|                                 | iv. above + family history of CVD                                                     |                                                      | -                                       |                                                                   | 1.34 (1.29 to 1.38)                     |
| <b>Subtypes of CVD‡</b>         |                                                                                       |                                                      |                                         |                                                                   |                                         |
|                                 | Ischemic heart disease                                                                | 934(2.80)/1544(2.63)                                 | 1.28 (1.15 to 1.43)                     | 1289(2.99)/8476(1.91)                                             | 1.39 (1.30 to 1.48)                     |
|                                 | Cerebrovascular disease                                                               | 603(1.80)/893(1.51)                                  | 1.34 (1.18 to 1.53)                     | 833(1.92)/5260(1.18)                                              | 1.43 (1.32 to 1.54)                     |
|                                 | Emboli and thrombosis                                                                 | 291(0.86)/352(0.59)                                  | 1.51 (1.25 to 1.83)                     | 398(0.91)/2050(0.46)                                              | 1.79 (1.59 to 2.02)                     |
|                                 | Hypertensive disease                                                                  | 707(2.11)/1185(2.01)                                 | 1.13 (1.00 to 1.27)                     | 947(2.19)/7973(1.79)                                              | 1.21 (1.12 to 1.30)                     |
|                                 | Heart failure                                                                         | 278(0.83)/414(0.70)                                  | 1.41 (1.15 to 1.73)                     | 404(0.93)/2413(0.54)                                              | 1.39 (1.23 to 1.56)                     |
|                                 | Arrhythmia/conduction disorder                                                        | 903(2.71)/1520(2.59)                                 | 1.09 (0.98 to 1.21)                     | 1217(2.82)/9533(2.15)                                             | 1.25 (1.18 to 1.34)                     |
|                                 | Fatal CVD events <sup>€</sup>                                                         | 377(1.17)/447(0.79)                                  | 1.64 (1.35 to 2.00)                     | 541(1.30)/2432(0.56)                                              | 1.60 (1.44 to 1.79)                     |

CVD, cardiovascular diseases

\* per 1,000 person-years

† Hazard ratios and 95% confidence intervals were derived from Cox models, stratified by family identifier (for sibling-based comparison) or matching identifier (birth year and sex, for population-based comparison), and adjusted for factors listed in model information column. Time since the index date was used as underlying time scale.

‡ The calculation of hazard ratios and 95% confidence intervals for subtypes of CVD was based on fully adjusted COX models (model iii for sibling-based comparison, and model iv for population-based comparison)

€ A fatal CVD was defined as death within 30 days after a major incident CVD event. This group involved fatal CVD cases from all above subtypes.

Supplementary Table F Number of cases and crude incidence rates (per 1000 person-years) for cardiovascular diseases (CVD) among patients with stress-related disorders, compared to *their full siblings or matched unexposed individuals*, by different characteristics

|                                                          | Analyses of sibling cohort, patients/siblings |                               |                         |                                                | Analyses of population-matched cohort, patients/unexposed individuals |                               |                          |                                                |
|----------------------------------------------------------|-----------------------------------------------|-------------------------------|-------------------------|------------------------------------------------|-----------------------------------------------------------------------|-------------------------------|--------------------------|------------------------------------------------|
|                                                          | All stress-related disorders                  | Posttraumatic stress disorder | Acute stress reaction   | Adjustment disorder and other stress reactions | All stress-related disorders                                          | Posttraumatic stress disorder | Acute stress reaction    | Adjustment disorder and other stress reactions |
| <b>Overall</b>                                           | 8057(9.98)/12082(8.42)                        | 561(9.59)/786(7.57)           | 3841(10.10)/5815(8.44)  | 3655(9.94)/5481(8.53)                          | 10921(10.46)/75107(6.91)                                              | 749(10.04)/4929(6.36)         | 5230(10.57)/35785(6.92)  | 4942(10.42)/34393(6.99)                        |
| <b>By sex</b>                                            |                                               |                               |                         |                                                |                                                                       |                               |                          |                                                |
| Male                                                     | 3875(12.80)/7118(9.93)                        | 243(14.01)/476(9.05)          | 1968(12.72)/3449(10.0)  | 1664(12.73)/3193(9.96)                         | 5161(13.15)/37060(8.7)                                                | 312(13.84)/2145(9.07)         | 2634(13.14)/18669(8.70)  | 2215(13.07)/16246(9.04)                        |
| Female                                                   | 4182(8.30)/4964(6.91)                         | 318(7.74)/310(6.05)           | 1873(8.28)/2366(6.85)   | 1991(8.42)/2288(7.11)                          | 5760(8.84)/38047(5.6)                                                 | 437(8.39)/2784(5.7)           | 2596(8.82)/17116(5.5)    | 2727(8.94)/18147(5.81)                         |
| <b>By age at index date (tertiles), years</b>            |                                               |                               |                         |                                                |                                                                       |                               |                          |                                                |
| ≤28                                                      | 956(3.58)/988(2.23)                           | 90(3.89)/88(2.32)             | 448(3.49)/485(2.28)     | 418(3.62)/415(2.15)                            | 1246(3.54)/6451(1.82)                                                 | 112(3.81)/488(1.6)            | 597(3.53)/3155(1.84)     | 537(3.51)/2808(1.82)                           |
| 29-42                                                    | 2375(7.89)/3186(6.18)                         | 164(8.29)/199(5.70)           | 1198(8.22)/1605(6.29)   | 1013(7.47)/1382(6.13)                          | 3044(8.03)/18892(4.7)                                                 | 215(8.71)/1202(4.67)          | 1547(8.40)/9511(4.95)    | 1282(7.53)/8179(4.64)                          |
| ≥43                                                      | 4726(19.7)/7908(16.6)                         | 307(19.7)/499(16.1)           | 2195(20.5)/3725(16.8)   | 2224(19.1)/3684(16.5)                          | 6631(21.17)/49764(14.71)                                              | 422(20.55)/3239(14.65)        | 3086(21.81)/23119(5.01)  | 3123(20.66)/23406(14.44)                       |
| <b>By attained age, i.e. age during follow-up, years</b> |                                               |                               |                         |                                                |                                                                       |                               |                          |                                                |
| <50                                                      | 3116(5.38)/3429(3.57)                         | 255(5.88)/238(3.29)           | 1474(5.35)/1645(3.56)   | 1387(5.33)/1546(3.63)                          | 3985(5.35)/21934(2.9)                                                 | 329(6.01)/1421(2.55)          | 1909(5.37)/10525(2.91)   | 1747(5.23)/9988(2.95)                          |
| ≥50                                                      | 4941(21.64)/8653(18.2)                        | 306(20.30)/548(17.42)         | 2367(22.39)/4170(18.39) | 2268(21.09)/3935(18.13)                        | 6936(23.15)/53178(16.05)                                              | 420(21.16)/3508(16.03)        | 16332(23.80)/25261(6.26) | 3195(22.78)/24409(15.84)                       |
| <b>By calendar year at index date</b>                    |                                               |                               |                         |                                                |                                                                       |                               |                          |                                                |
| 1987-1996                                                | 3156(11.3)/5465(9.47)                         | 257(11.8)/416(9.45)           | 1635(11.3)/2879(9.54)   | 1264(11.3)/2170(9.39)                          | 4382(11.98)/30951(7.84)                                               | 355(12.69)/2588(8.54)         | 2285(12.01)/15945(7.79)  | 1742(11.81)/12418(7.78)                        |
| 1997-2006                                                | 3392(9.72)/4845(8.26)                         | 182(8.90)/234(6.74)           | 1557(9.88)/2172(8.13)   | 1653(9.66)/2439(8.56)                          | 4541(10.09)/31460(6.81)                                               | 234(9.08)/1492(5.68)          | 2088(10.21)/14305(6.78)  | 2219(10.10)/15663(6.97)                        |
| 2007-2013                                                | 1509(8.41)/1772(6.52)                         | 122(7.53)/136(5.41)           | 649(8.25)/764(6.37)     | 738(8.74)/872(6.88)                            | 1998(8.75)/12696(5.51)                                                | 160(7.67)/849(4.06)           | 857(8.55)/5535(5.45)     | 981(9.15)/6312(5.85)                           |
| <b>By history of severe somatic diseases*</b>            |                                               |                               |                         |                                                |                                                                       |                               |                          |                                                |
| Yes                                                      | 1870(13.95)/2145(11.68)                       | 138(13.25)/153(11.27)         | 866(13.84)/1037(11.93)  | 866(14.18)/955(14.49)                          | 2581(14.35)/12235(10.12)                                              | 183(13.37)/789(9.34)          | 1201(14.17)/5765(10.13)  | 1197(14.70)/5681(10.24)                        |
| No                                                       | 6187(9.19)/9937(7.94)                         | 423(8.80)/633(7.01)           | 2975(9.33)/4778(7.94)   | 2789(9.09)/4526(8.09)                          | 8340(9.65)/62872(6.51)                                                | 566(9.29)/4140(5.99)          | 4029(9.82)/30020(6.52)   | 3745(9.53)/28712(6.57)                         |

| By previous history of psychiatric disorders <sup>†</sup> |                        |                     |                       |                       |                          |                        |                          |                          |  |
|-----------------------------------------------------------|------------------------|---------------------|-----------------------|-----------------------|--------------------------|------------------------|--------------------------|--------------------------|--|
| Yes                                                       | 2947(12.8)/1573(11.9)  | 242(11.3)/98(9.55)  | 1352(13.0)/749(11.7)  | 1353(12.8)/726(12.4)  | 4022(13.21)/6243(10.58)  | 306(11.22)/419(9.61)   | 1852(13.34)/2927(10.59)  | 1864(13.48)/2897(10.72)  |  |
| No                                                        | 5110(8.86)/10509(8.07) | 319(8.58)/688(7.34) | 2489(8.98)/5066(8.11) | 2302(8.78)/4755(8.14) | 6899(9.33)/68864(6.70)   | 443(9.36)/4510(6.16)   | 3378(9.49)/32858(6.71)   | 3078(9.16)/31496(6.77)   |  |
| By family history of CVD among first-degree relatives     |                        |                     |                       |                       |                          |                        |                          |                          |  |
| Yes                                                       | 5100(14.4)/7904(12.2)  | 349(14.4)/496(11.1) | 2387(14.5)/3738(12.1) | 2364(14.3)/3670(12.4) | 6566(14.99)/44756(10.47) | 442(14.76)/2839(10.00) | 3069(14.99)/20917(10.46) | 3055(15.02)/21000(10.54) |  |
| No                                                        | 2957(6.52)/4178(5.32)  | 212(6.20)/290(4.91) | 1454(6.70)/2077(5.46) | 1291(6.38)/1811(5.24) | 4355(7.19)/30351(4.60)   | 307(6.87)/2090(4.25)   | 2161(7.45)/14868(4.69)   | 1887(6.96)/13393(4.57)   |  |

\* Involved severe somatic diseases include chronic pulmonary disease, connective tissue disease, diabetes, renal diseases, liver diseases, ulcer diseases, and HIV infection/AIDS.

<sup>†</sup> The first diagnosis of a psychiatric disorder, other than stress-related disorders, occurred *more than* three months prior to the index date

Supplementary Table G Change of relative risk for acute cardiovascular events over follow-up time among patients with stress-related disorders, compared to *their full siblings*

|             | Acute cerebrovascular disease                        |                                                     | Acute myocardial infarction                          |                                                     | Cardiac arrest                                       |                                                     |
|-------------|------------------------------------------------------|-----------------------------------------------------|------------------------------------------------------|-----------------------------------------------------|------------------------------------------------------|-----------------------------------------------------|
|             | Number of cases (incidence rate*), patients/siblings | Hazard ratio (95% confidence interval) <sup>†</sup> | Number of cases (incidence rate*), patients/siblings | Hazard ratio (95% confidence interval) <sup>†</sup> | Number of cases (incidence rate*), patients/siblings | Hazard ratio (95% confidence interval) <sup>†</sup> |
| < 1 months  | 28(1.08)/31(0.74)                                    | 1.85 (0.99 to 3.44)                                 | 25(0.97)/19(0.46)                                    | 2.81 (1.33 to 5.91)                                 | 3(0.35)/0(0)                                         | -                                                   |
| 1-5 months  | 17(0.68)/18(0.45)                                    | 1.84 (0.79 to 3.41)                                 | 18(0.72)/31(0.77)                                    | 0.92 (0.45 to 1.90)                                 | 12(0.29)/7(0.10)                                     | 3.71 (0.88 to 8.59)                                 |
| 6-11 months | 42(0.85)/40(0.49)                                    | 1.79 (1.06 to 3.03)                                 | 41(0.83)/54(0.67)                                    | 1.23 (0.75 to 2.02)                                 | 10(0.20)/8(0.10)                                     | 2.34 (0.63 to 8.78)                                 |
| 1-4 years   | 298(0.94)/349(0.66)                                  | 1.81 (1.50 to 2.17)                                 | 261(0.82)/450(0.85)                                  | 1.28 (1.07 to 1.55)                                 | 64(0.20)/58(0.11)                                    | 2.24 (1.48 to 3.39)                                 |
| 5-9 years   | 267(1.17)/428(1.06)                                  | 1.23 (1.03 to 1.47)                                 | 313(1.38)/492(1.23)                                  | 1.45 (1.22 to 1.74)                                 | 62(0.27)/73(0.18)                                    | 1.53 (1.03 to 2.28)                                 |
| ≥ 10 years  | 489(2.56)/744(1.92)                                  | 1.65 (1.44 to 1.90)                                 | 466(2.48)/854(2.24)                                  | 1.57 (1.37 to 1.81)                                 | 90(0.47)/126(0.33)                                   | 1.65 (1.19 to 2.28)                                 |

\* per 1,000 person-years

<sup>†</sup> Cox models were stratified by family identifiers, and adjusted for age at index date, sex, education level, family income, marital status, history of severe somatic diseases, and history of other psychiatric disorders. Time since the index date was used as underlying time scale.

Supplementary Table H Hazard ratios with 95% confidence intervals for cardiovascular diseases (CVD) among patients with stress-related disorders, compared to *their full siblings*, using altered definition for the history of other psychiatric disorders (as one covariate)

|                                | All stress-related disorders | Posttraumatic stress disorder | Acute stress reaction | Adjustment disorder and other stress reactions |
|--------------------------------|------------------------------|-------------------------------|-----------------------|------------------------------------------------|
| <b>&lt;1 year of follow-up</b> |                              |                               |                       |                                                |
| <b>Any CVD</b>                 | 1.64 (1.45 to 1.85)          | 1.90 (1.13 to 3.20)           | 1.63 (1.37 to 1.93)   | 1.64 (1.37 to 1.96)                            |
| Ischemic heart disease         | 1.53 (1.17 to 1.99)          | 2.84 (0.57 to 14.2)           | 1.69 (1.17 to 2.45)   | 1.32 (0.88 to 2.00)                            |
| Cerebrovascular disease        | 1.73 (1.25 to 2.39)          | 5.36 (0.64 to 45.1)           | 1.81 (1.11 to 2.96)   | 1.77 (1.08 to 2.91)                            |
| Emboli and thrombosis          | 1.74 (1.08 to 2.78)          | 1.17(0.14 to 9.82)            | 1.98 (0.97 to 4.02)   | 2.29 (0.91 to 5.74)                            |
| Hypertensive disease           | 2.12 (1.60 to 2.81)          | 3.26 (0.75 to 14.1)           | 2.25 (1.46 to 3.47)   | 2.36 (1.51 to 3.70)                            |
| Heart failure                  | 2.42 (1.22 to 4.82)          | -                             | 4.37 (1.04 to 18.4)   | 5.29 (1.02 to 27.4)                            |
| Arrhythmia/conduction disorder | 1.38 (1.09 to 1.75)          | 0.69 (0.14 to 3.38)           | 1.29 (0.90 to 1.85)   | 1.54 (1.09 to 2.17)                            |
| Fatal CVD events <sup>†</sup>  | 1.77 (1.13 to 2.75)          | 0.28 (0.10 to 7.88)           | 3.65 (1.55 to 8.59)   | 1.42 (0.74 to 2.75)                            |
| <b>≥1 year of follow-up</b>    |                              |                               |                       |                                                |
| <b>Any CVD</b>                 | 1.29 (1.25 to 1.34)          | 1.45 (1.25 to 1.70)           | 1.31 (1.24 to 1.39)   | 1.24 (1.17 to 1.31)                            |
| Ischemic heart disease         | 1.35 (1.26 to 1.45)          | 1.45 (1.06 to 1.98)           | 1.40 (1.27 to 1.55)   | 1.29 (1.16 to 1.43)                            |
| Cerebrovascular disease        | 1.43 (1.31 to 1.55)          | 2.13 (1.52 to 2.99)           | 1.43 (1.27 to 1.62)   | 1.35 (1.19 to 1.54)                            |
| Emboli and thrombosis          | 1.52 (1.33 to 1.73)          | 2.54 (1.34 to 4.84)           | 1.48 (1.21 to 1.79)   | 1.48 (1.22 to 1.79)                            |
| Hypertensive disease           | 1.17 (1.08 to 1.26)          | 1.58 (1.15 to 2.19)           | 1.16 (1.04 to 1.30)   | 1.14 (1.01 to 1.28)                            |
| Heart failure                  | 1.40 (1.22 to 1.60)          | 1.73 (1.01 to 2.98)           | 1.40 (1.14 to 1.71)   | 1.41 (1.15 to 1.73)                            |
| Arrhythmia/conduction disorder | 1.16 (1.08 to 1.24)          | 1.10 (0.84 to 1.46)           | 1.21 (1.09 to 1.34)   | 1.09 (0.99 to 1.21)                            |
| Fatal CVD events <sup>†</sup>  | 1.57 (1.38 to 1.78)          | 1.84 (0.97 to 3.49)           | 1.45 (1.21 to 1.74)   | 1.64 (1.35 to 2.00)                            |

CVD, cardiovascular diseases

\* Cox models were stratified by matching identifiers (birth year and sex), and adjusted for education level, family income, marital status, history of severe somatic diseases, and history of other psychiatric disorders (180 days prior to the diagnosis of stress-related disorder). Time since the index date was used as underlying time scale.

<sup>†</sup>A fatal CVD was defined as death within 30 days after a major incident CVD event. This group involved fatal CVD cases from all above subtypes.

Analyses of sibling cohort

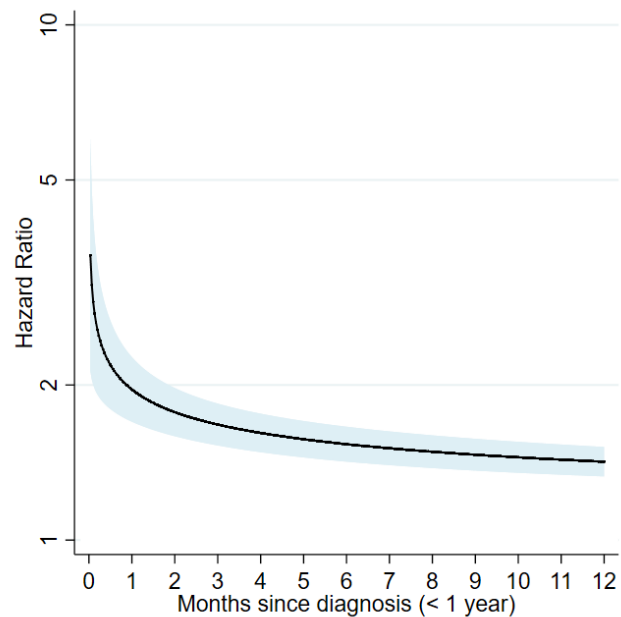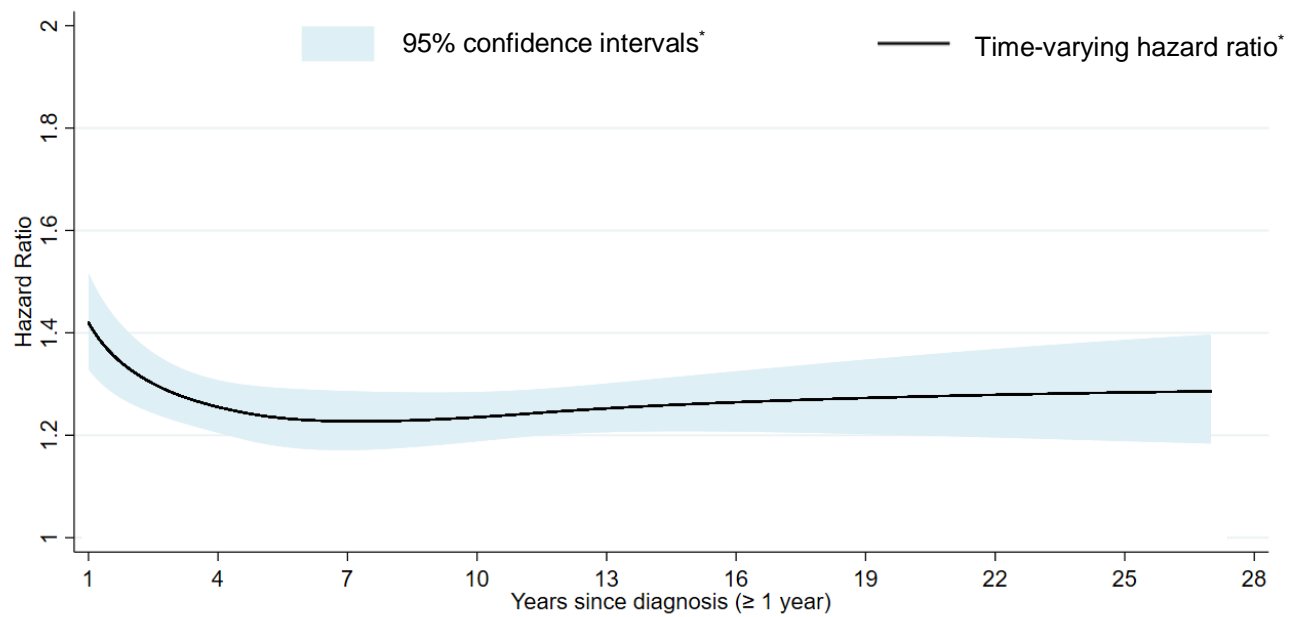

Analyses of population-matched cohort

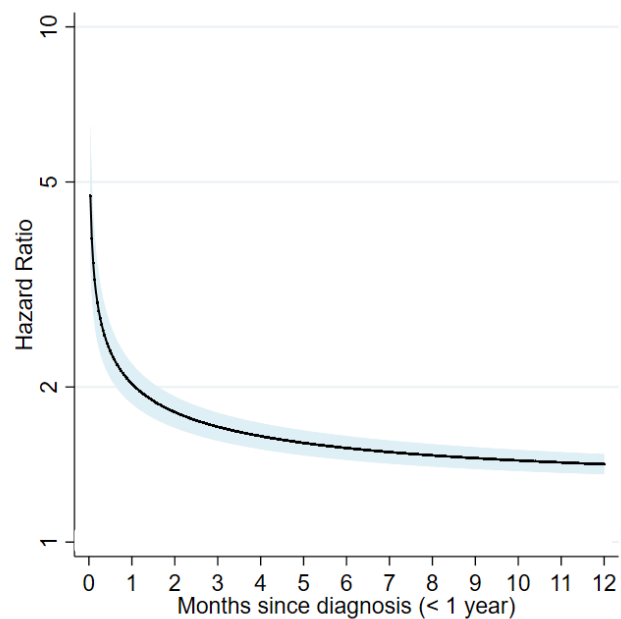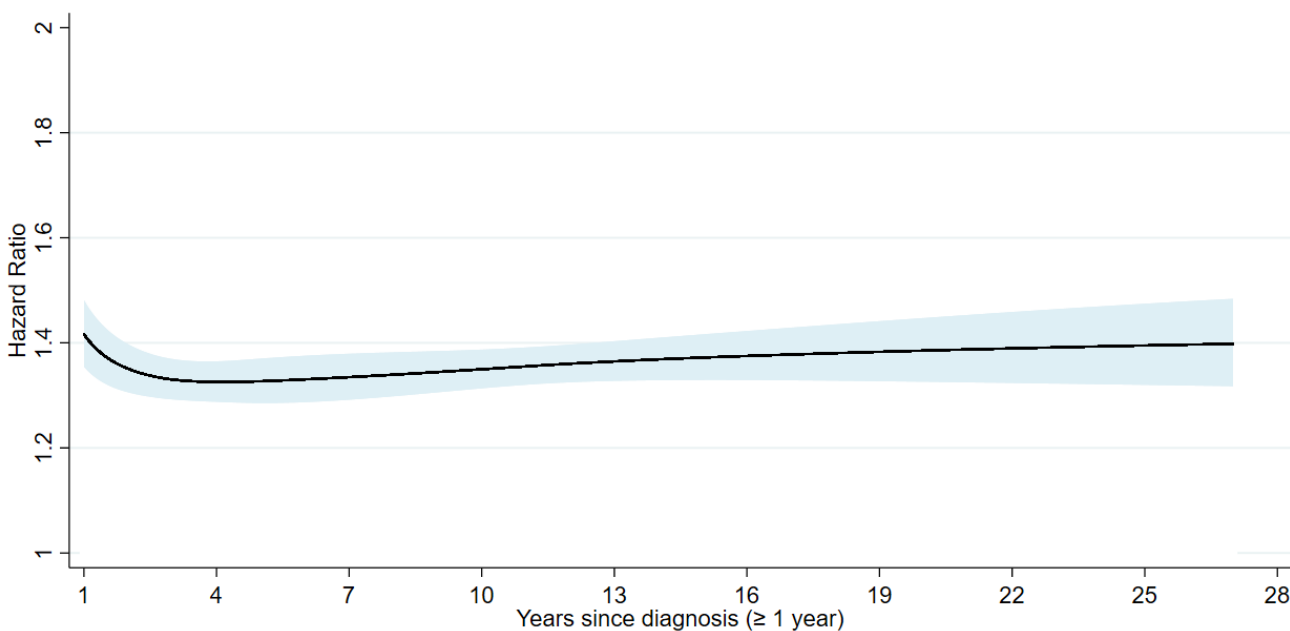

Supplementary Figure A Change of the relative risk for cardiovascular diseases over follow-up time among patients with any stress-related disorder, compared to their full siblings (analyses of sibling cohort) or matched unexposed individuals (analyses of population-matched cohort)

\* Time-varying hazard ratios and 95% confidence intervals were derived from flexible parametric survival models, allowing the effect of stress-related disorders to vary over time. A spline with 5 df (4 intermediate knots and 2 knots at each boundary, placed at quintiles of distribution of events) was used for the baseline rate, while 3 df was used for the time-varying effect. All models were adjusted for age at index date, sex, education level, family income, marital status, history of severe somatic diseases, family history of CVD, and history of other psychiatric disorders.

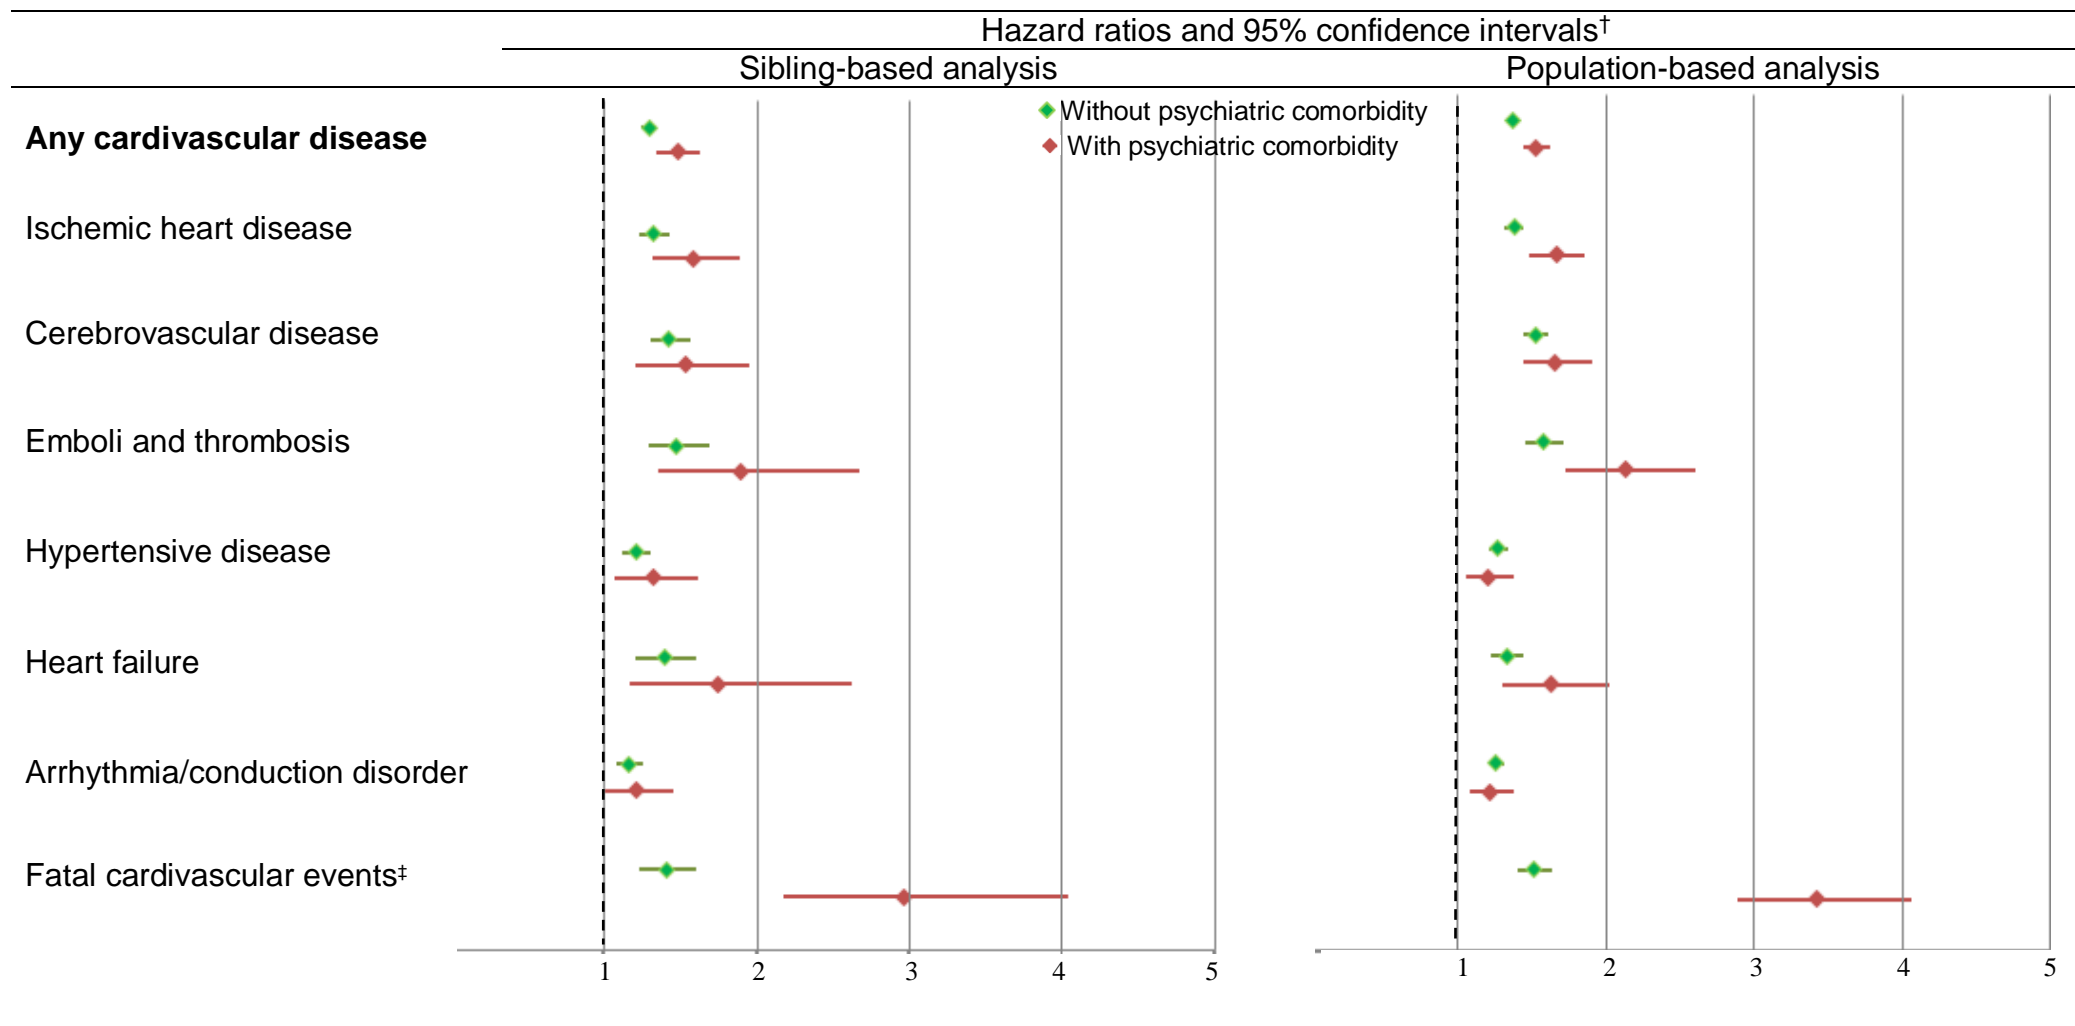

Supplementary Figure B. Relative risks for cardiovascular diseases or specific cardiovascular events among stress-related disorder patients, sub-grouped by the occurrence of psychiatric comorbidity\*, compared to ***their full siblings or matched unexposed individuals***

\*Defined as new-onset psychiatric disorder (other than stress-related disorder) diagnosed from ***three months before*** to ***one year after*** the diagnosis of stress-related disorder.

<sup>†</sup> For sibling-based analysis, the Cox models were stratified by family identifiers, and adjusted for age, sex, education level, family income, marital status, history of severe somatic diseases, and history of other psychiatric disorders. For population-based analysis, the Cox models were stratified by matching identifiers (birth year and sex), and adjusted for education level, family income, marital status, history of severe somatic diseases, family history of CVD, and history of other psychiatric disorders. Time since the index date was used as underlying time scale. The occurrence of psychiatric comorbidity was considered as a time-varying variable.

‡ A fatal cardiovascular event was defined as death within 30 days after a major incident CVD event. This group involved fatal CVD cases from all above subtypes.
